# Supplementary material for: Dysfunction of histone demethylase IBM1 in Arabidopsis causes autoimmunity and reshapes the root microbiome
Source: PubMed Central journal article supplement (PMC9561531; doi:10.1038/s41396-022-01297-6), 2022-07-30
Supplement: 41396_2022_1297_MOESM1_ESM.pdf [file 41396_2022_1297_MOESM1_ESM.pdf]

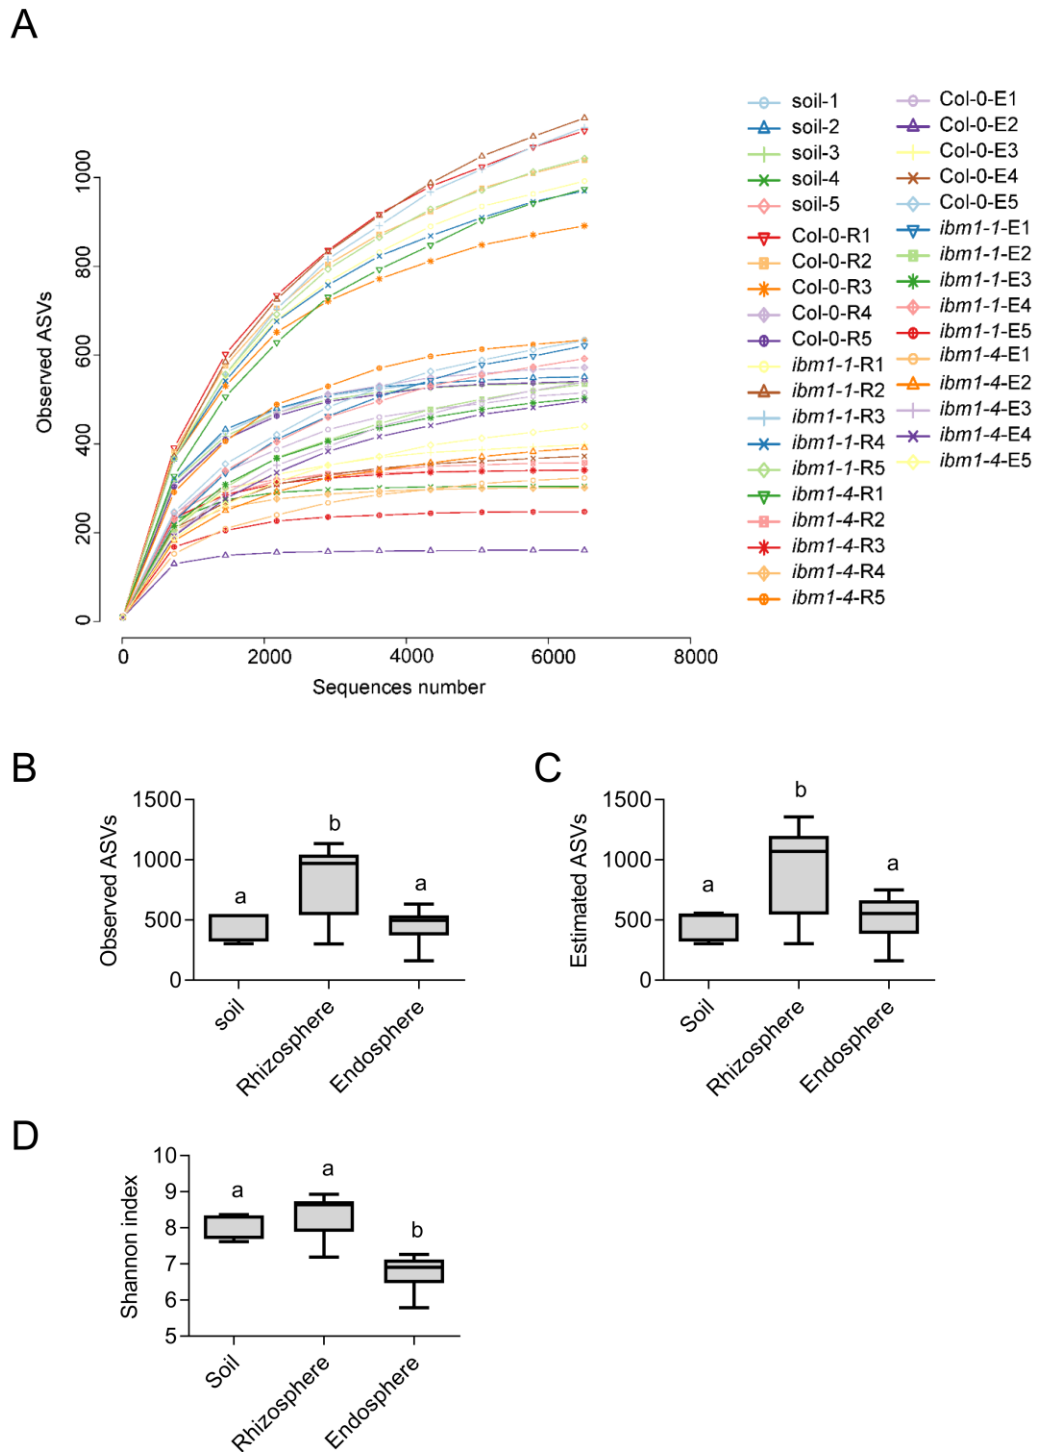

**Figure S1. Bacteria richness in different compartments reflects the selectivity of plants on root-associated microbes (Related to Figure 1).**

**[A]** Rarefaction curves of each sample. **[B]** Numbers of observed ASVs in the different compartments. **[C]** Numbers of estimated ASVs based on the Chao1 estimator. **[D]** Shannon index of the microbe diversity. The analysis was based on the table of normalized absolute abundance of ASVs. Letters denote statistical significance ( $p < 0.05$ , Turkey).

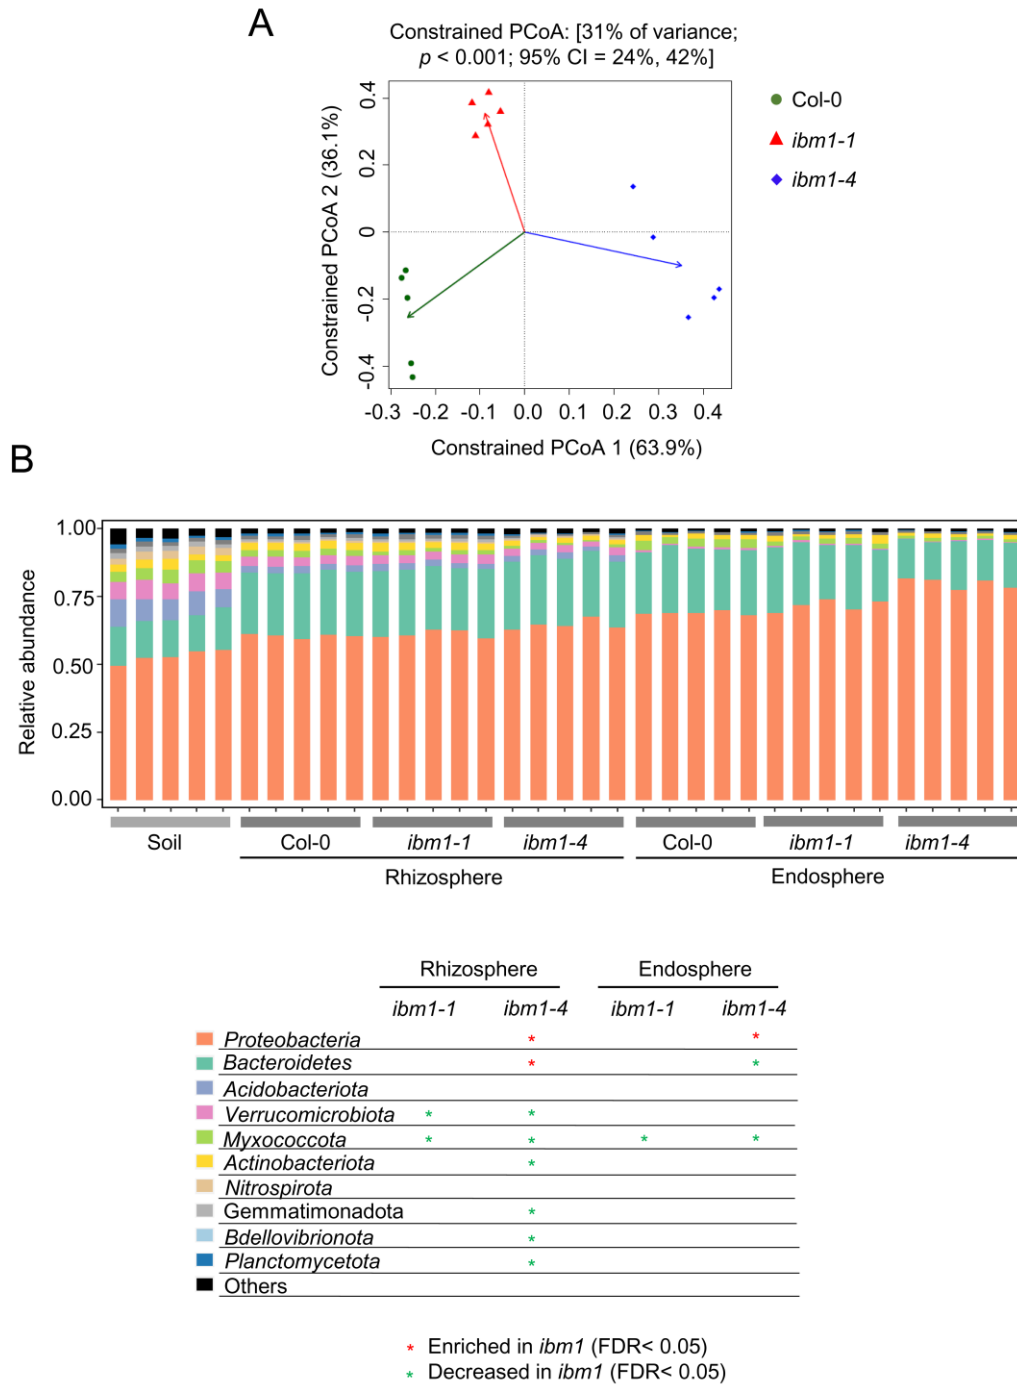

**Figure S2. IBM1 dysfunction alters plant-associated microbiome (Related to Figure 1).**

**[A]** The PCoA analysis of all ASVs separates the *ibm1* mutants from the wild type plants (Col-0) within the rhizosphere compartment. **[B]** Relative abundance (RA) of the top 10 bacteria phyla detected within the bulk soil (Soil), rhizosphere, and endosphere compartments. Statistical significance (FDR < 0.05) of phylum RA between the mutant and the wild type plants is indicated by asterisks in the table.

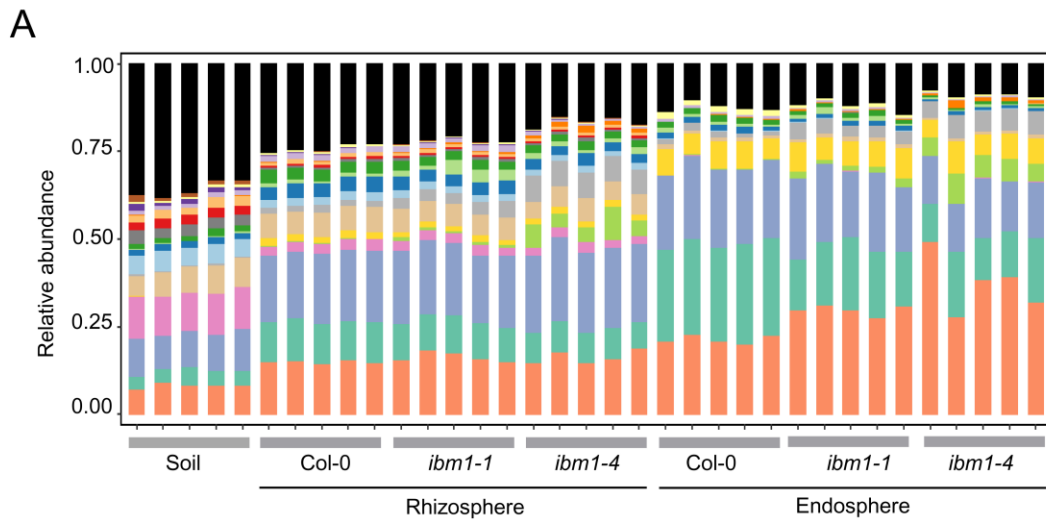

**B**

|                            | Rhizosphere   |               | Endosphere    |               |
|----------------------------|---------------|---------------|---------------|---------------|
|                            | <i>ibm1-1</i> | <i>ibm1-4</i> | <i>ibm1-1</i> | <i>ibm1-4</i> |
| <i>Comamonadaceae</i>      |               |               | *             | *             |
| <i>Oxalobacteraceae</i>    | *             | *             | *             | *             |
| <i>Flavobacteriaceae</i>   |               | *             |               | *             |
| <i>Nitrosomonadaceae</i>   |               |               |               |               |
| <i>Aeromonadaceae</i>      | *             | *             | *             | *             |
| <i>Rhizobiaceae</i>        | *             |               |               |               |
| <i>Sphingomonadaceae</i>   | *             | *             |               |               |
| <i>Pseudomonadaceae</i>    | *             | *             | *             | *             |
| <i>Pedospaeraceae</i>      | *             |               |               |               |
| <i>Xanthomonadaceae</i>    |               | *             |               | *             |
| <i>Cellvibrionaceae</i>    |               |               |               |               |
| <i>Caulobacteraceae</i>    | *             | *             |               | *             |
| <i>TRA3-20</i>             |               |               |               |               |
| <i>Nitrospiraceae</i>      |               |               |               |               |
| <i>SC-I-84</i>             |               |               |               |               |
| <i>Enterobacteriaceae</i>  | *             | *             | *             | *             |
| <i>Microscillaceae</i>     |               | *             |               | *             |
| <i>Vicinamibacteraceae</i> |               |               |               |               |
| <i>Sandaracinaceae</i>     | *             | *             | *             | *             |
| <i>Subgroup 5</i>          |               |               |               |               |
| <i>Other classify</i>      |               |               |               |               |

\* Enriched in *ibm1* (FDR < 0.05)  
 \* Decreased in *ibm1* (FDR < 0.05)

**Figure S3. Taxonomic structure of ASVs (Amplicon Sequence Variants) reveals the impacts of IBM1 dysfunction on root microbiome at family level (Related to Figure 1).**

**[A]** Relative abundance (RA) of the top 20 bacteria families detected within the bulk soil (Soil), rhizosphere, and endosphere compartments. **[B]** A table summarizing statistical significance (FDR < 0.05 as indicated by asterisks) between the mutant and the wild type plants of family RA as showed in panel A.

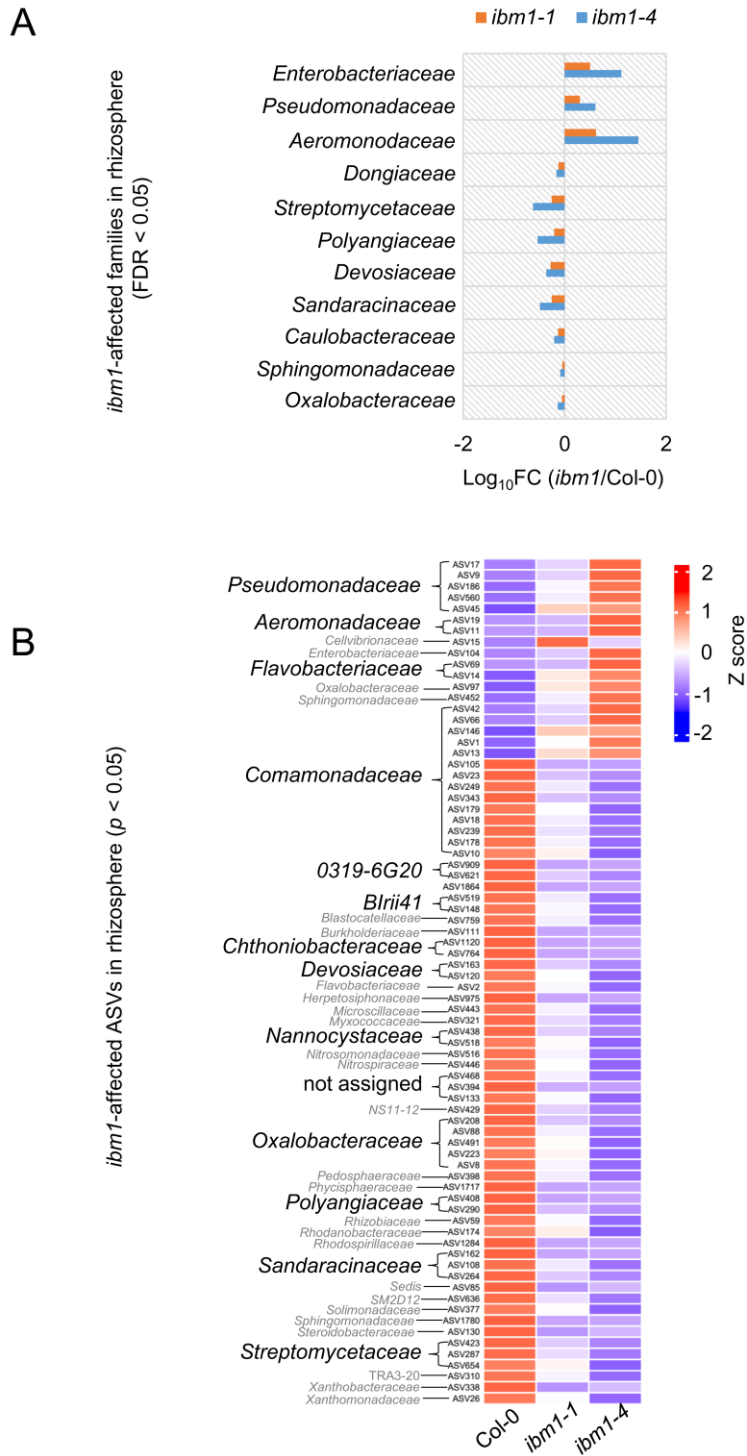

**Figure S4. IBM1 dysfunction reshapes Arabidopsis rhizosphere microbiome (Related to Figure 1).** [A] The *ibm1* mutations resulted in altered (FDR < 0.05 for both the *ibm1-1* vs Col-0 and the *ibm1-4* vs Col-0) RA in 11 bacteria families within the rhizosphere microbiome. The Log<sub>10</sub> fold changes of mutant vs wild type are shown as horizontal bars. [B] The *ibm1* mutations resulted in altered (*p* < 0.05 for both the *ibm1-1* vs Col-0 and the *ibm1-4* vs Col-0) RA in 76 rhizosphere ASVs in the mutants compared to the wild type. The left notes indicate the taxonomy of each ASV at family level.

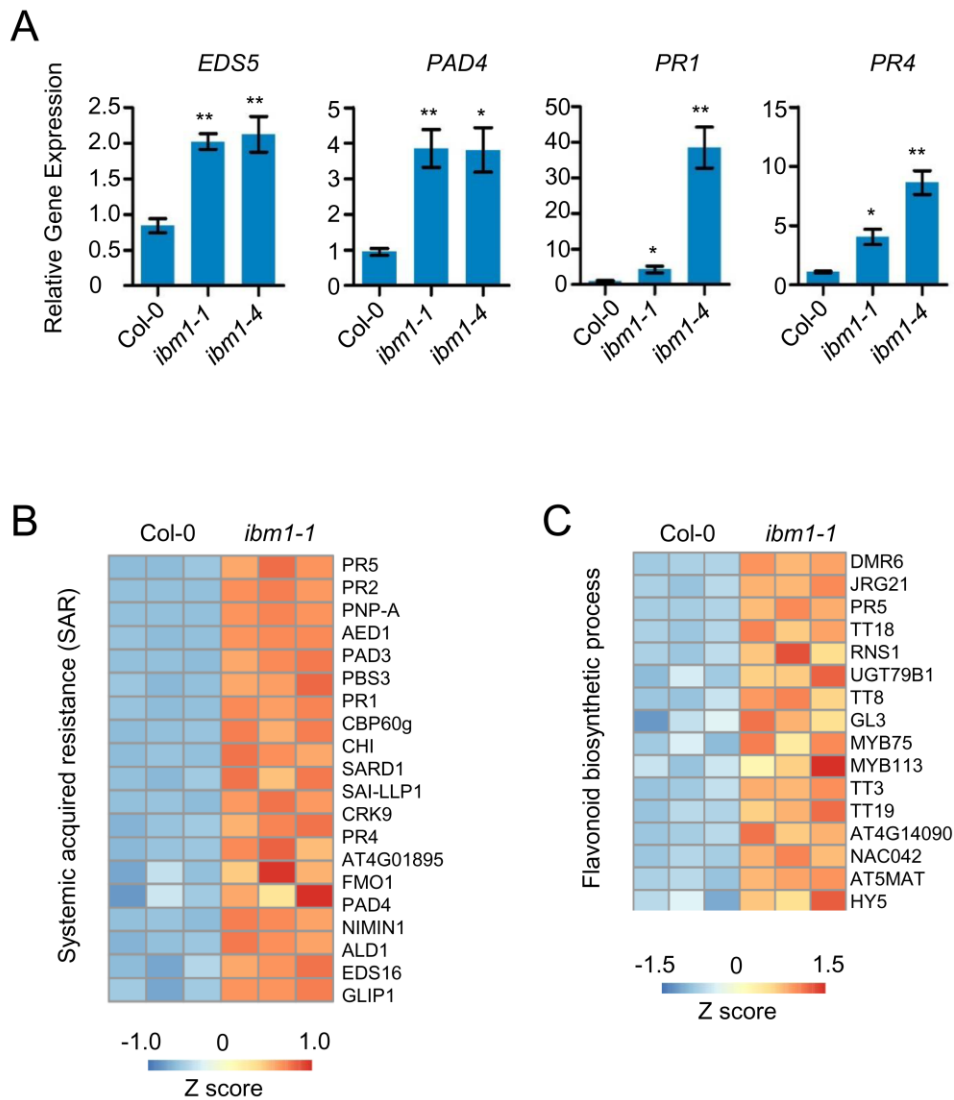

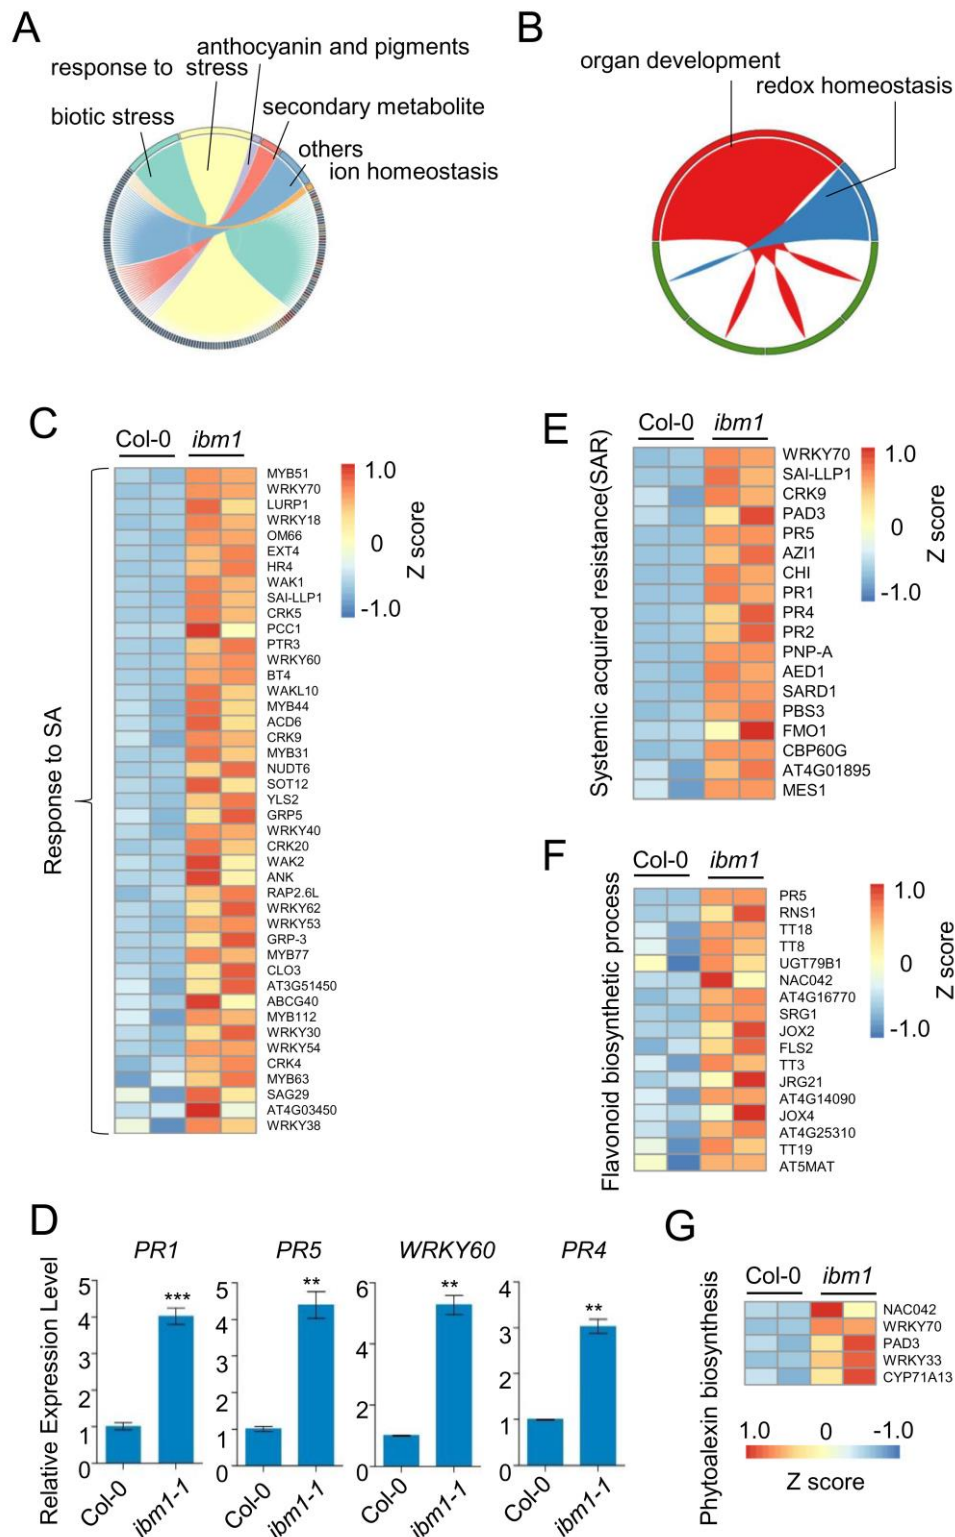

**Figure S6. IBM1 dysfunction causes autoimmunity in Arabidopsis grown in sterile medium (Related to Figure 2).**

The differentially expressed genes (DEGs; fold change  $\geq 2$ , FDR  $\leq 0.05$ ) that were up-regulated **[A]** and down-regulated **[B]** in *ibm1-1* compared to Col-0 were subject to the Gene Ontology (GO) analysis. The chord diagrams show the GO terms that link to their sub-classifications. The sub-

classifications are labeled with GO ID that can be queried together with their corresponding DEGs in Dataset S2 (Sheet 9 and 11). **[C]** A heatmap of DEGs involved in SA signaling or biosynthesis. **[D]** Gene expression levels of *PR1*, *PR4*, *PR5*, and *WRKY60* in 7-day-old Col-0 and *ibm1-1* plants grown in sterile half-strength MS medium. Results of RT-qPCR are shown. Mean  $\pm$  SE, n = 3 technical replicates. Two biological replicates were analyzed with similar results. \*\* indicate  $p < 0.01$  (Student's t-test). **[E]** A heatmap of DEGs involved in systemic acquired resistance (SAR). **[F]** A heatmap of DEGs involved in the flavonoid biosynthesis process. **[G]** A heatmap of DEGs involved in phytoalexin biosynthesis.

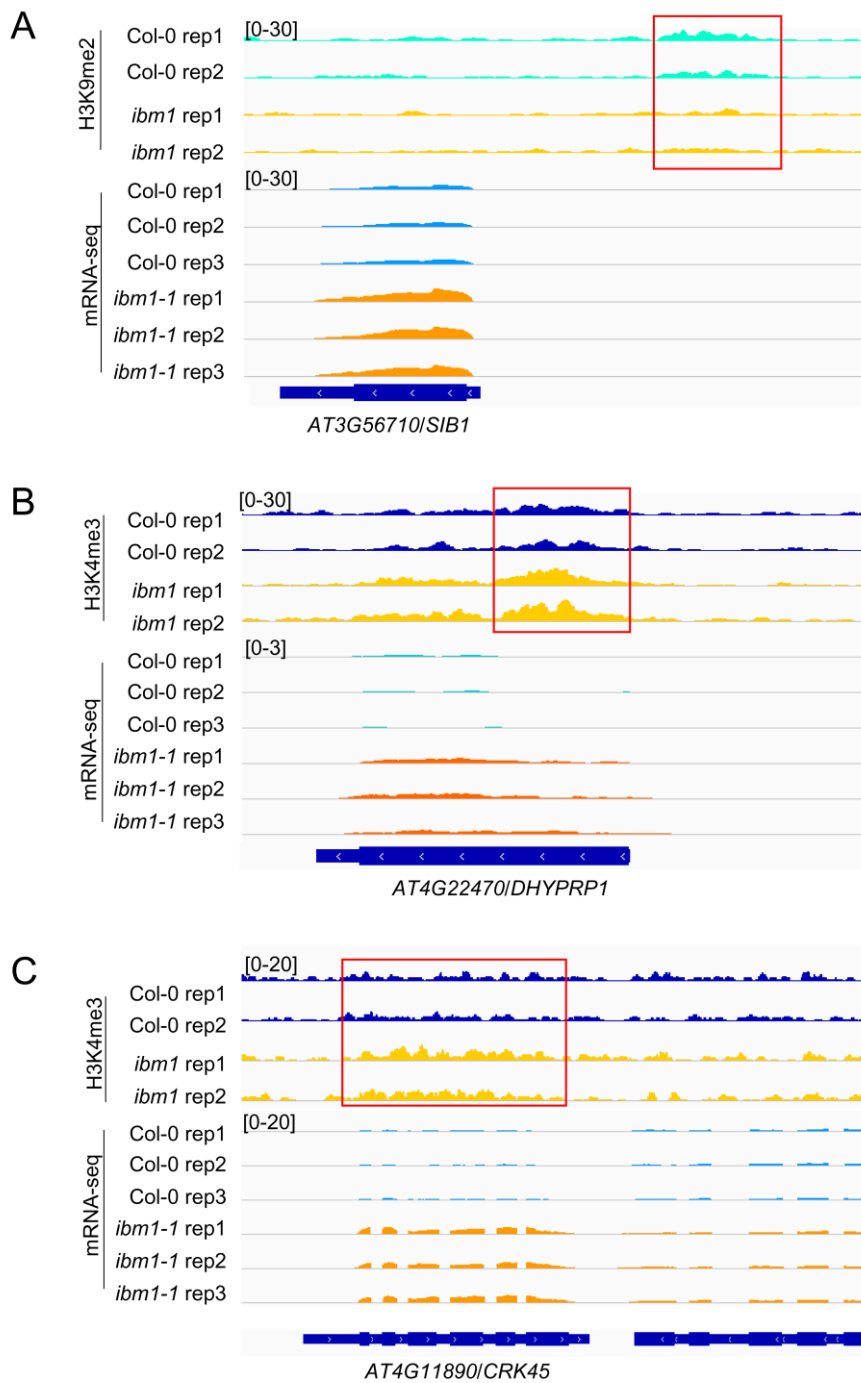

**Figure S7. IBM1 dysfunction results in histone modifications permissive for transcription of some important defense genes (Related to Figure 3).**

**[A]** IBM1 dysfunction decreases H3K9me2 level at the gene promoter region of *SIGMA FACTOR BINDING PROTEIN1 (SIB1)* and increases the mRNA level of *SIB1*. Snapshots from ChIP-seq and RNA-seq are shown. The original ChIP-seq data were downloaded from DDBJ (DRA005154) as generated previously (24). The red box indicates the region with altered H3K9me2 levels. **[B]** IBM1 dysfunction increases H3K4me3 level at the gene body region of *DHYPRP1* and increases the mRNA level of *DHYPRP1*. **[C]** IBM1 dysfunction increases H3K4me3 level at the gene body region of *CRK45* and increases the mRNA level of *CRK45*.



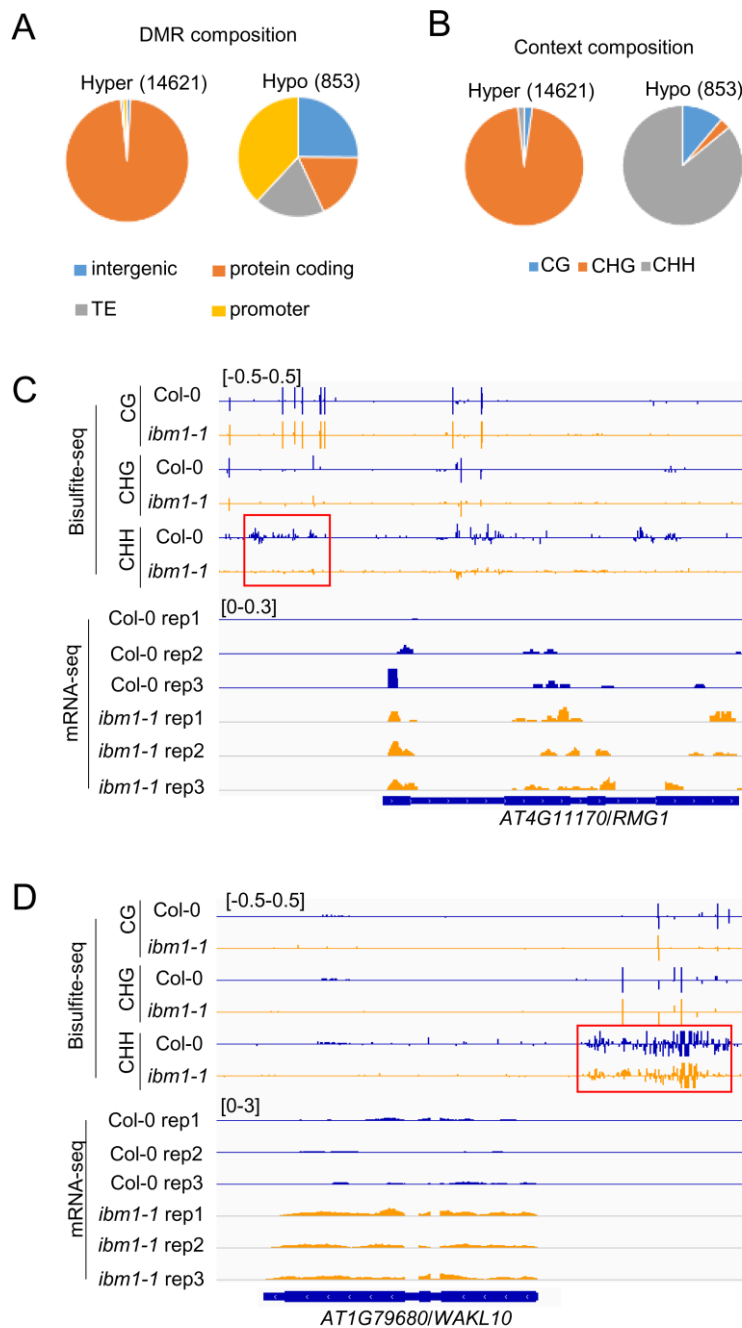

**Figure S8. IBM1 dysfunction decreases DNA methylation levels in the promoter regions of some important defense genes (Related to Figure 3).**

**[A]** The composition of the hyper methylated and hypo methylated DMRs (differentially methylated regions) caused by IBM1 dysfunction. **[B]** The composition of differentially methylated cytosines in the CG, CHG, and CHH contexts. **[C]** IBM1 dysfunction decreases DNA methylation level at the promoter region of *RMG1* and increases the mRNA level of *RMG1*. Snapshots from whole genome bisulfite sequencing and RNA-seq are shown. The red box indicates the gene promoter region with altered CHH methylation levels. **[D]** IBM1 dysfunction decreases DNA methylation level at the promoter region of *WAKL10* and increases the mRNA level of *WAKL10*.

**A**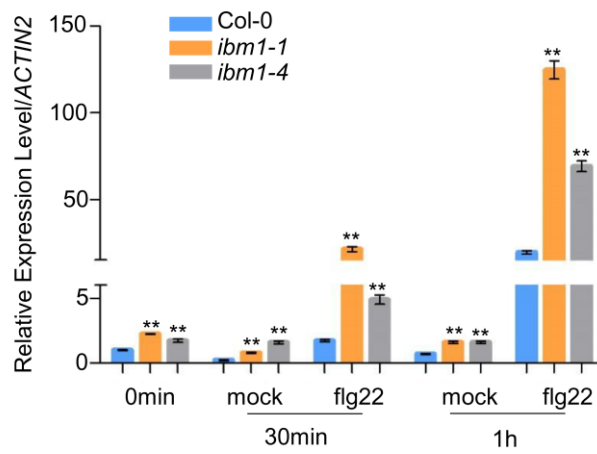**B**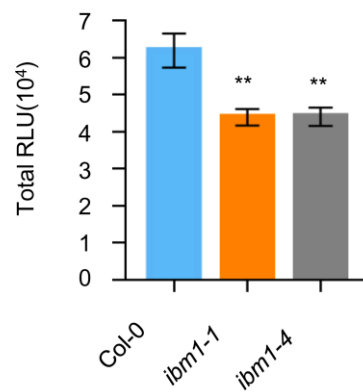

**Figure S9. IBM1 dysfunction alters flg22-induced plant immune responses (Related to Figure 4).** [A] Gene expression levels of the PTI marker gene *FRK1*. Seven-day-old *ibm1* mutants and wild type (Col-0) plants were dip-inoculated with 100 nM flg22 and harvested at the indicated time points. Results of RT-qPCR are shown. Mean  $\pm$  SE,  $n = 3$  technical replicates. Two biological replicates were analyzed with similar results. \*\* indicate  $p < 0.01$  (Student's t-test). [B] Measurements of ROS burst induced by flg22. Leaf discs from four-week-old plants elicited with 50 nM flg22. Mean  $\pm$  SE,  $n = 3$  biological replicates, each consisting of 16 leaf discs.

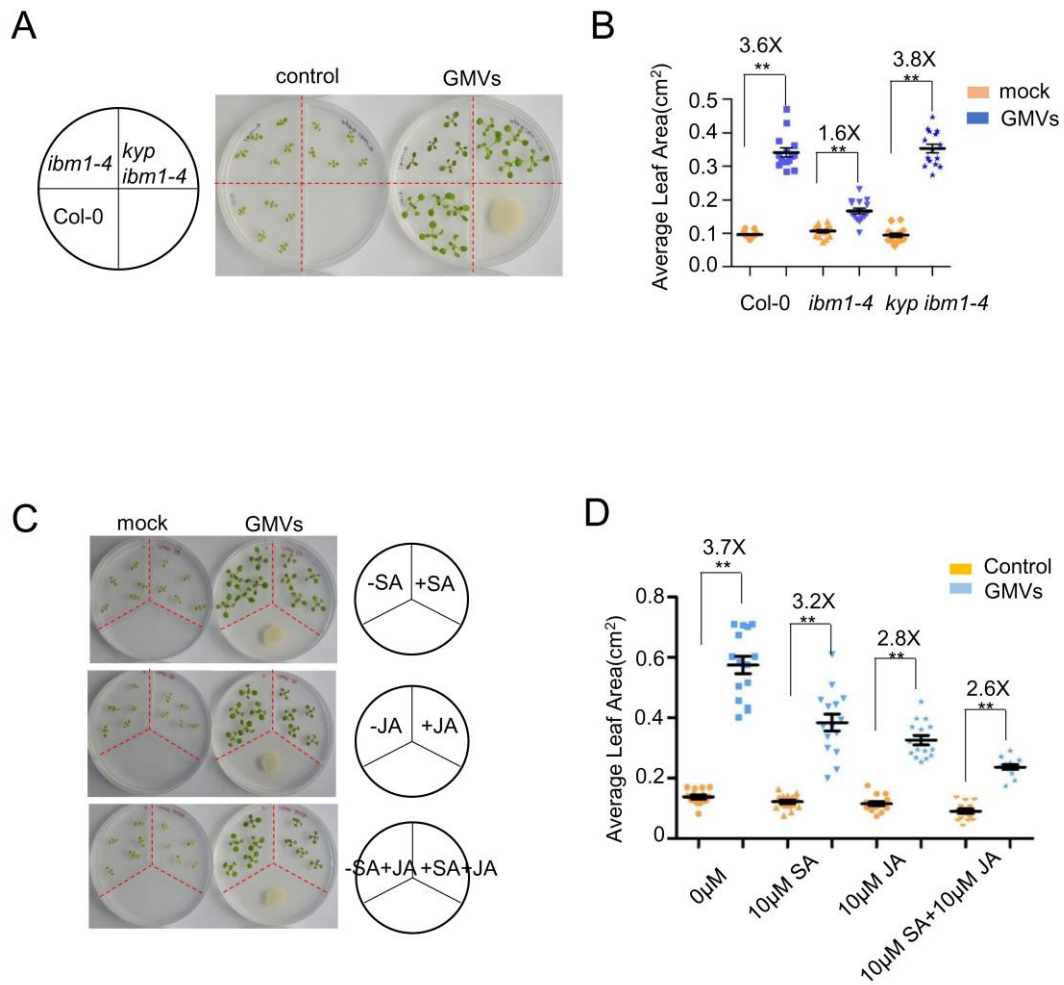

**Figure S10. Dysfunction of IBM1 and activation of defense impair plant growth-promotion triggered by GMVs (Related to Figure 4).**

**[A]** IBM1 dysfunction impairs plant growth-promotion triggered by GB03-produced microbial volatiles (GMVs); the impairment can be rescued by a second mutation of *kyp* in the *ibm1* mutant. Images were taken at 7 days after treatment (DAT). Red-dotted lines indicate inner plastic partitions that divide the plate into four parts. **[B]** Quantification of total leaf area per seedling (TLA) of the plants at 7 DAT. Mean  $\pm$  SE,  $n = 15$ . All fold changes are associated with statistical significance of  $p < 0.01$  (Student's t-test). **[C]** Exogenous application of SA and/or JA mimicked *ibm1* mutations in impairing GMV-triggered plant growth-promotion. Images were taken at 7 days after treatment (DAT). **[D]** Quantification of TLA of the SA/JA-treated plants at 7 DAT. Mean  $\pm$  SE,  $n = 15$ . All fold changes are associated with statistical significance of  $p < 0.01$  (Student's t-test).

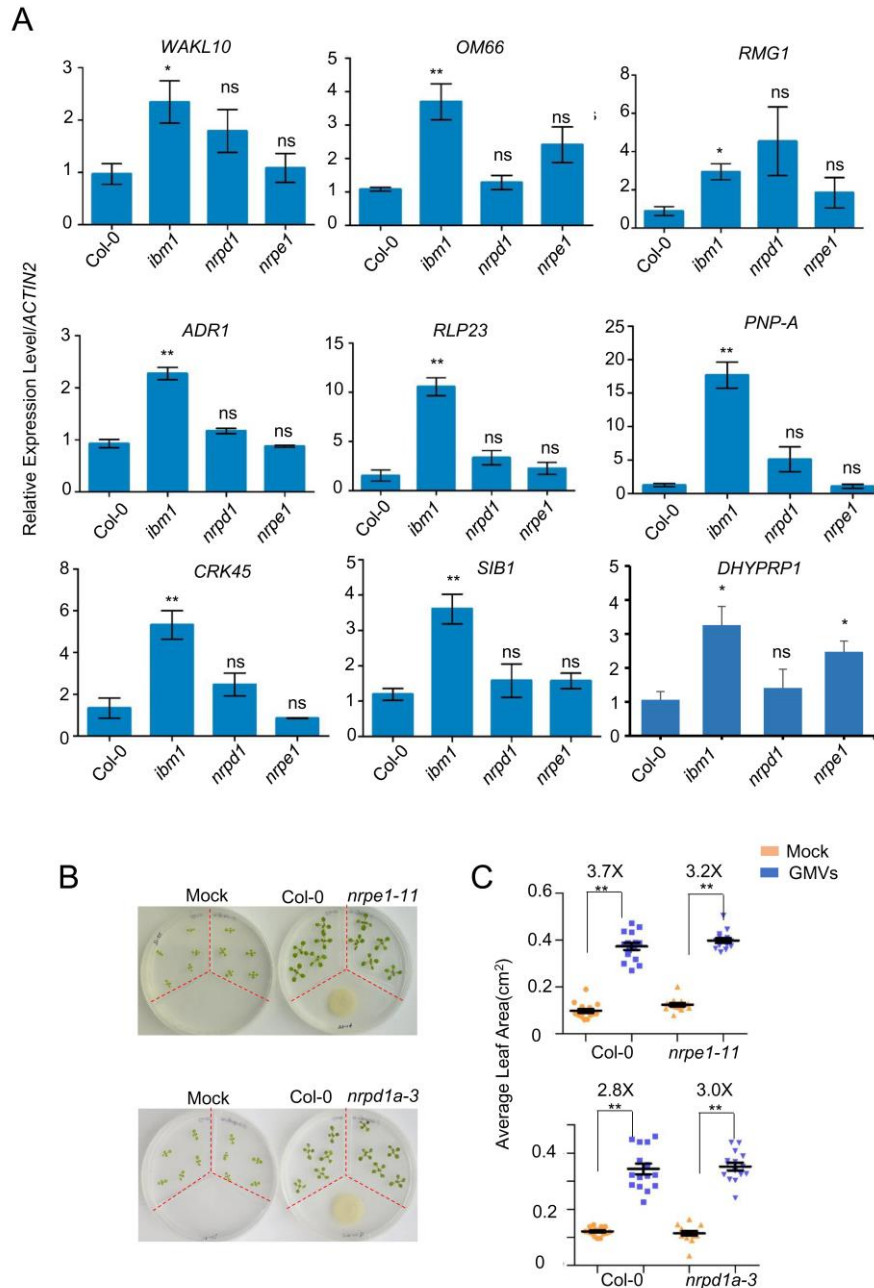

**Figure S11. IBM1 has stronger impacts on plant-microbe interactions than the RNA-directed DNA methylation (RdDM) pathway (Related to Figure 4).**

**[A]** IBM1 dysfunction (*ibm1-1*), but not defective RdDM (*nrpd1-3* and *nrpe1-11*), induces gene expression of all the examined defense regulators. Results of RT-qPCR are shown. Mean  $\pm$  SE,  $n = 3$  biological replicates. \* and \*\* indicate  $p < 0.05$  and  $p < 0.01$ , respectively (Student's t-test). **[B]** The RdDM mutants *nrpd1-3* and *nrpe1-11* showed similar plant growth-promotion as wild type plants (Col-0) in response to GMVs. Images were taken at 6 days after treatment (DAT). Red-dotted lines indicate inner plastic partitions that divide the plate into three parts. **[C]** Quantification of total leaf area per seedling (TLA) of the plants at 6 DAT. Mean  $\pm$  SE,  $n = 15$  seedlings in three biological replicates. All fold changes are associated with statistical significance of  $p < 0.01$  (Student's t-test).
